# Supplementary material for: Pharmacological Analysis of Intrinsic Neuronal Oscillations in rd10 Retina
Source: PLoS One. 2014 Jun 11;9(6):e99075. doi: 10.1371/journal.pone.0099075 (PMC4053359; doi:10.1371/journal.pone.0099075)
Supplement: Table S1 — Frequencies observed in LFP oscillations in rd10 . Experiments were performed on a total of 33 animals ranging from 1–12 months. The group aged 9 months also includes the animals aged 9.5 months. The frequency of oscillations was slightly higher in animals between 1 and 3 months. In animals aged 4–12 months, little variation in the frequency was observed. Frequency is given as mean ± standard deviation (SD). (DOCX) [file pone.0099075.s002.docx]

|  | | **Age of animals (Months)** | **Frequency (Hz)**  **mean ± SD** | **Number of retinal pieces** | **Number of animals and (number of pieces per animal)** | | --- | --- | --- | --- | | 1 | 6.21 ± 0.94 | 12 | 6 (2 each) | | 3 | 6.08 ± 0.53 | 7 | 3 (2,2,3) | | 4 | 4.14 ± 0.35 | 4 | 2 (2 each) | | 6 | 4.01 ± 0.08 | 3 | 2 (1,2) | | 7 | 4.21 ± 0.54 | 7 | 2 (3,4) | | 8 | 4.23 ± 0.65 | 9 | 5 (2,2,2,2,1) | | 9 | 4.40 ± 0.40 | 15 | 5 (3 each) | | 10 | 4.31 ± 0.73 | 5 | 3 (2,2,1) | | 11 | 4.03 ± 0.20 | 2 | 2 (1) | | 12 | 3.58 ± 0.64 | 3 | 3 (1) | |  |  |
| --- | --- | --- | --- | --- | --- | --- | --- | --- | --- | --- | --- | --- | --- | --- | --- | --- | --- | --- | --- | --- | --- | --- | --- | --- | --- | --- | --- | --- | --- | --- | --- | --- | --- | --- | --- | --- | --- | --- | --- | --- | --- | --- | --- | --- | --- | --- | --- |
